# Supplementary material for: Synthesis of metal silicides using polyhedral oligomeric silsesquioxane as a silicon source for semi-hydrogenation of phenylacetylene
Source: Royal Society of Chemistry journal article supplement (doi:10.1039/d1qi01586a), 2022-01-01
Supplement: d1qi01586a1.pdf [file d1qi01586a1.pdf]

## Synthesis of Metal Silicides Using Polyhedral Oligomeric Silsesquioxane as Silicon Source for Semi-Hydrogenation of phenylacetylene

Ming Cheng <sup>a</sup>, Xu Zhang <sup>b\*</sup>, Zhenbo Guo <sup>a</sup>, Zhen Zhou <sup>d</sup>, Zhiqiang Wang <sup>c\*</sup> and

Minghui Zhang <sup>a\*</sup>

<sup>a</sup>. Key Laboratory of Advanced Energy Materials Chemistry (Ministry of Education),  
College of Chemistry, Nankai University, Tianjin, 300071, PR China.

<sup>b</sup>. Engineering Research Center of Advanced Functional Material Manufacturing of  
Ministry of Education, School of Chemical Engineering, Zhengzhou University,  
Zhengzhou, 450001, PR China.

<sup>c</sup>. Tianjin Key Laboratory of Water Environment and Resources, Tianjin Normal  
University, Tianjin, 300387, PR China.

<sup>d</sup>. School of Materials Science and Engineering, Institute of New Energy Material  
Chemistry, Key Laboratory of Advanced Energy Materials Chemistry (Ministry of  
Education), Nankai University, Tianjin, 300350, PR China.

---

\*Corresponding Author

E-mail: zhangmh@nankai.edu.cn; zqwang@mail.nankai.edu.cn; zhangxu@nankai.edu.cn;

### Chemicals

Analytical-grade Pd(CH<sub>3</sub>COO)<sub>2</sub>, Ni(acac)<sub>2</sub>, RuCl<sub>3</sub>, and PtCl<sub>4</sub> were obtained from Tianjin Xiensi Chemical Reagents, China. Tetrahydrofuran, toluene, dimethoxymethylsilane, and phenyltriethoxysilane were purchase from Aladdin. All chemicals were from commercial sources and used without further purification.

### Synthesis of Ni<sub>2</sub>Si/SiO<sub>2</sub>, Ru<sub>x</sub>Si/SiO<sub>2</sub> and Pt<sub>x</sub>Si/SiO<sub>2</sub> catalyst

20 mg nickel Ni(acac)<sub>2</sub> was dispersed in 20 mL of tetrahydrofuran, 1 g of the as-prepared phenyl-POSS sample was added. After stirring for 2 h at room temperature. Finally, the mixture

was separated by rotary evaporator, and dried at 70 °C overnight in the oven. The resulting solid was heated to 1000 °C at a ramp of 20 °C/min and kept for 2 h under hydrogen atmosphere. The catalysts were designated as Ni<sub>2</sub>Si/SiO<sub>2</sub> catalyst. The Ru<sub>x</sub>Si/SiO<sub>2</sub> and Pt<sub>x</sub>Si/SiO<sub>2</sub> catalysts were prepared by the same way as Ni<sub>2</sub>Si/SiO<sub>2</sub> catalyst, except for using 20 mg RuCl<sub>3</sub> or PtCl<sub>4</sub> in 20 mL ethanol.

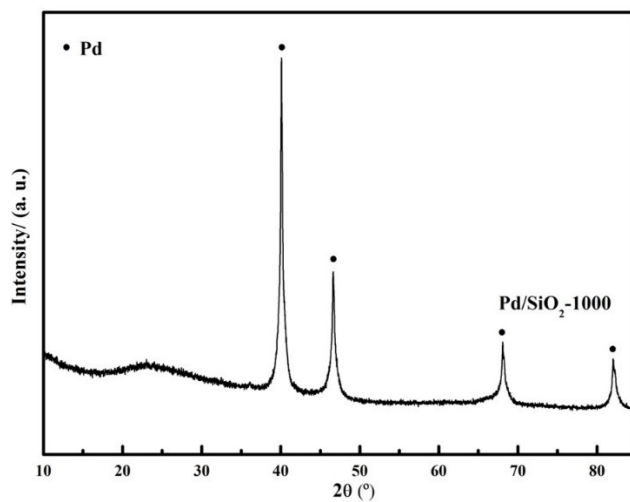

Figure S1. The XRD pattern of Pd/SiO<sub>2</sub>-1000 catalyst.

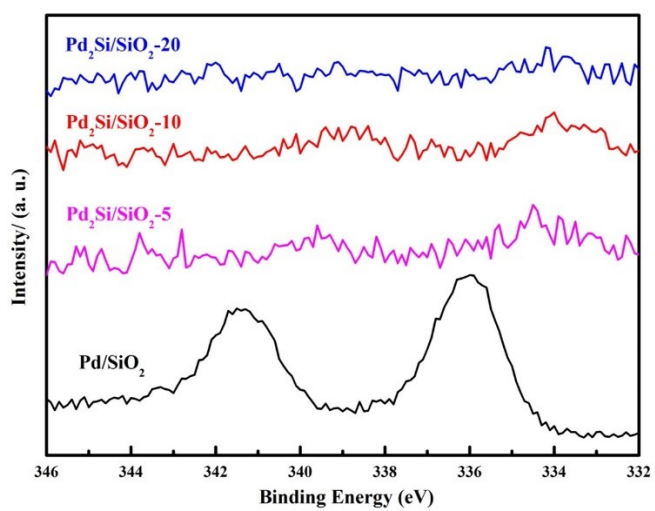

Figure S2. Pd 3d XPS spectra of Pd<sub>2</sub>Si/SiO<sub>2</sub>-X and Pd/SiO<sub>2</sub> catalysts.

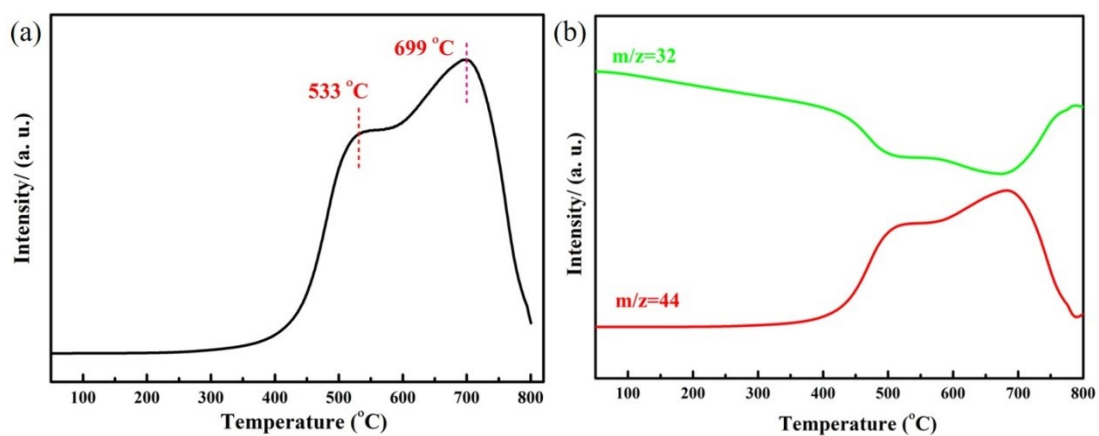

Figure S3. O<sub>2</sub>-TPO-MS profile of the Pd<sub>2</sub>Si/SiO<sub>2</sub>-1000-H<sub>2</sub> catalyst.

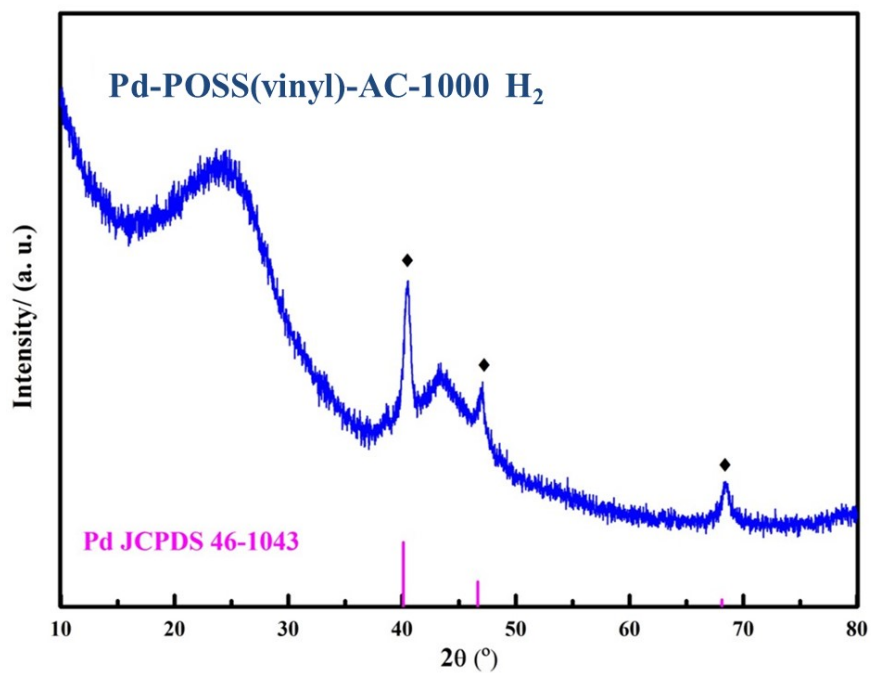

Figure S4. The XRD pattern of Pd-POSS-AC-1000 H<sub>2</sub> sample.

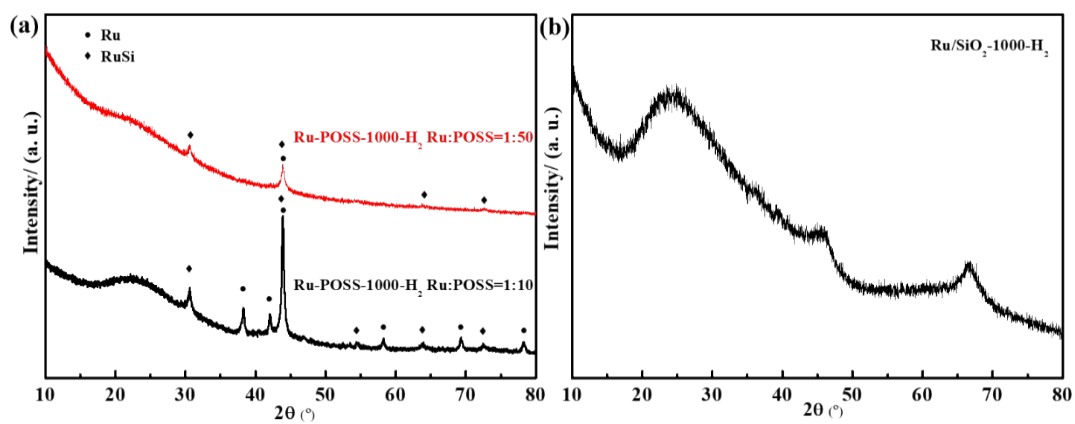

Figure S5. XRD patterns of Ru-POSS-1000-H<sub>2</sub> and Ru/SiO<sub>2</sub>-1000-H<sub>2</sub> catalysts.

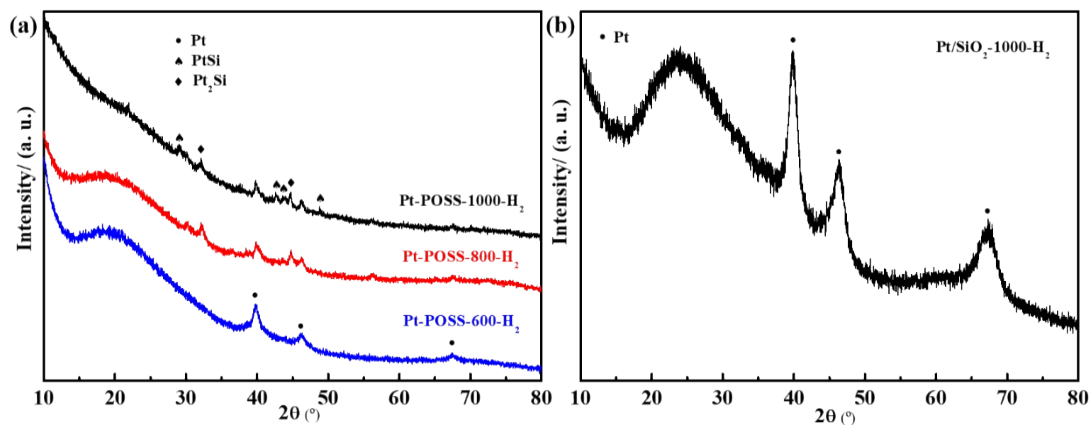

Figure S6. XRD patterns of Pt-POSS-600/800/1000-H<sub>2</sub> and Pt/SiO<sub>2</sub>-1000-H<sub>2</sub> catalysts.

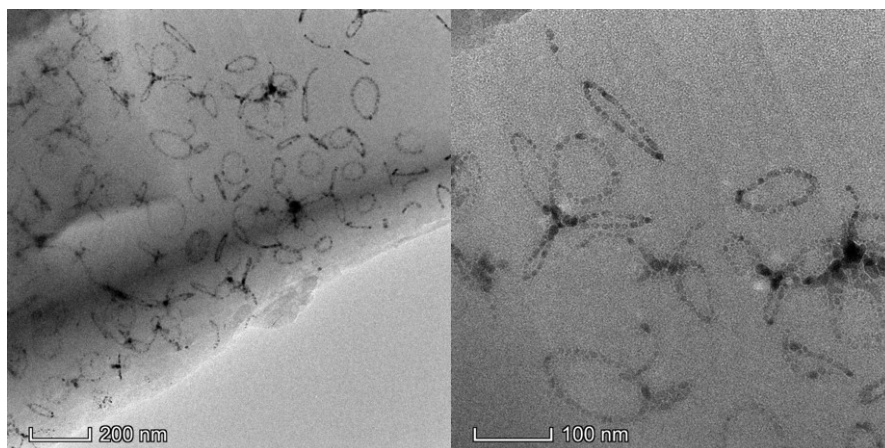

Figure S7. TEM images of Ru<sub>x</sub>Si/SiO<sub>2</sub> catalyst.

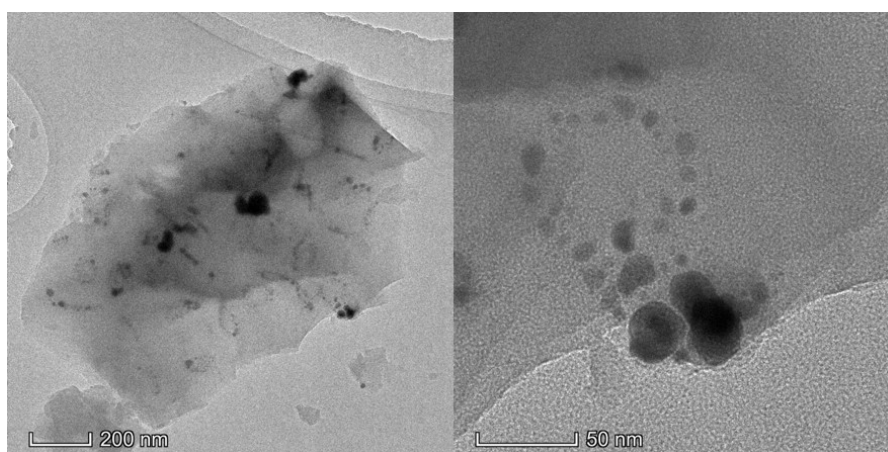

Figure S8. TEM images of Pt<sub>x</sub>Si/SiO<sub>2</sub> catalyst.

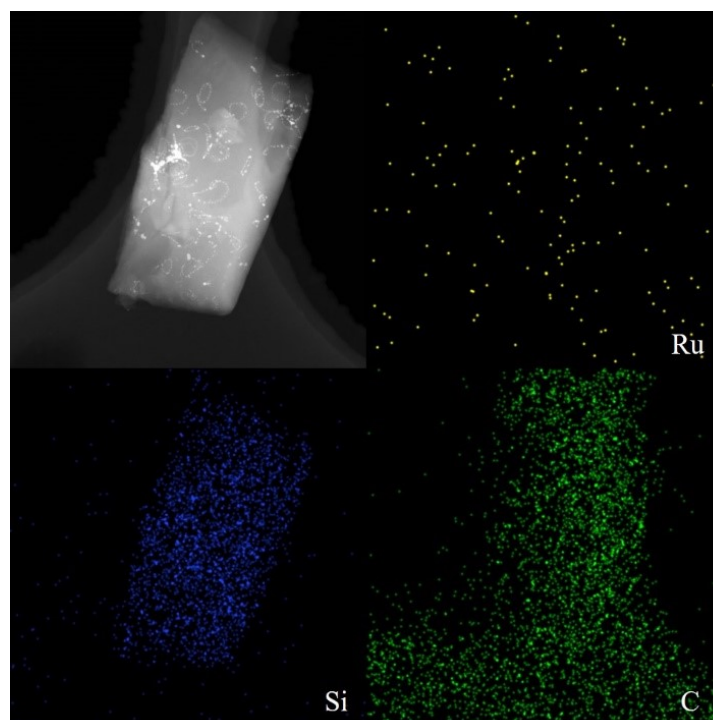

Figure S9. EDX-mapping of Ru, Si and C element in  $\text{Ru}_x\text{Si}/\text{SiO}_2$  catalyst.

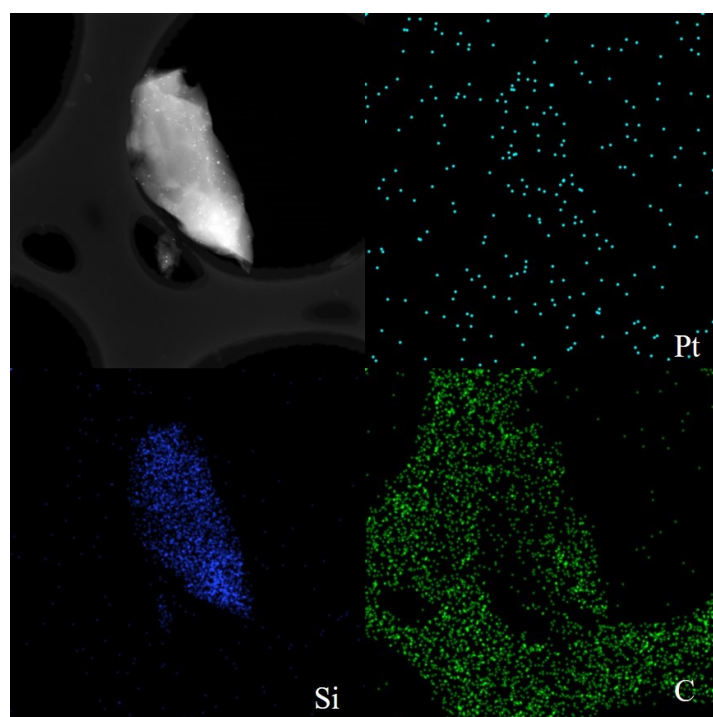

Figure S10. EDX-mapping of Pt, Si and C element in  $\text{Pt}_x\text{Si}/\text{SiO}_2$  catalyst.

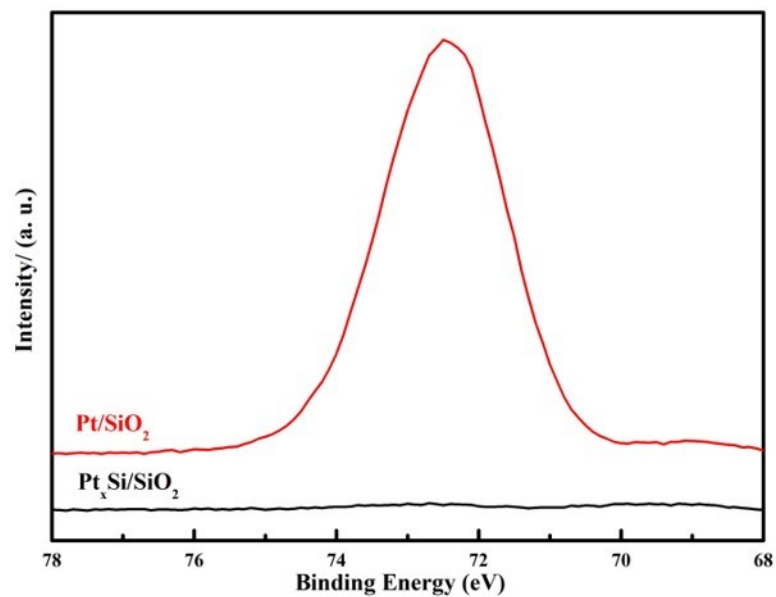

Figure S11. Pt 3d XPS spectra of Pt<sub>x</sub>Si/SiO<sub>2</sub> and Pt/SiO<sub>2</sub> catalysts.

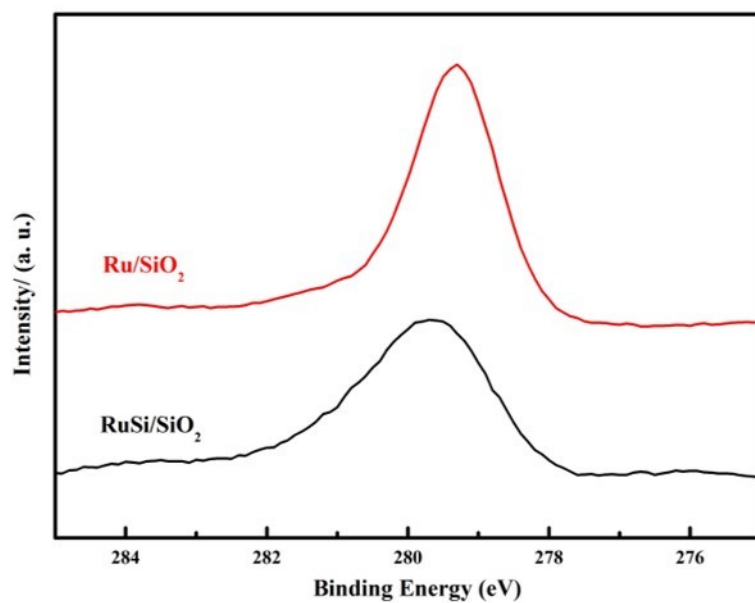

Figure S12. Ru 3d XPS spectra of Ru<sub>x</sub>Si/SiO<sub>2</sub> and Ru/SiO<sub>2</sub> catalysts.



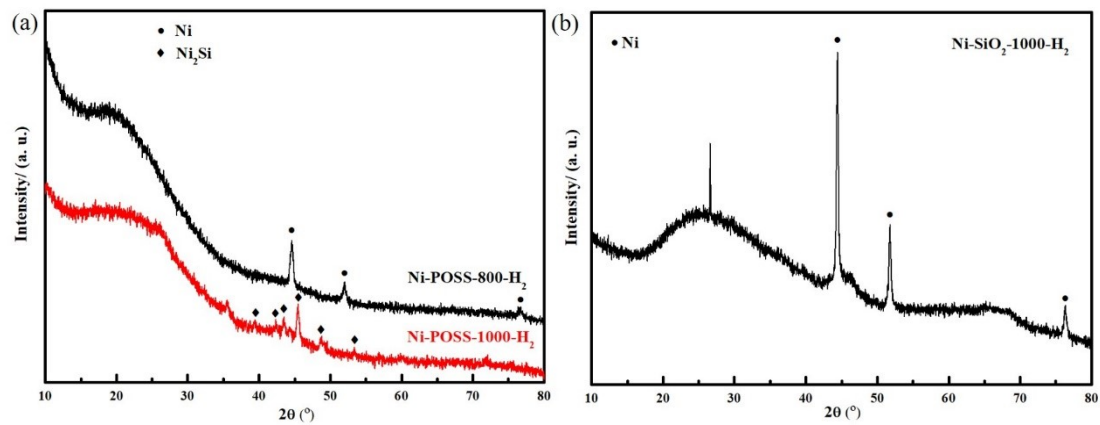

Figure S13. The XRD patterns of Ni-POSS-800/1000-H<sub>2</sub> and Ni/SiO<sub>2</sub>-1000-H<sub>2</sub> catalysts.

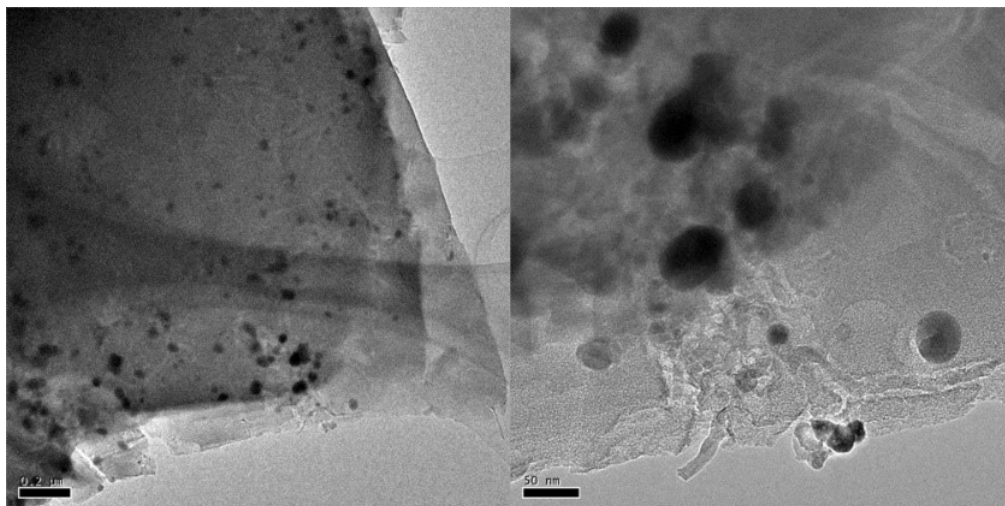

Figure S14. The TEM images of Ni<sub>2</sub>Si/SiO<sub>2</sub> catalyst.

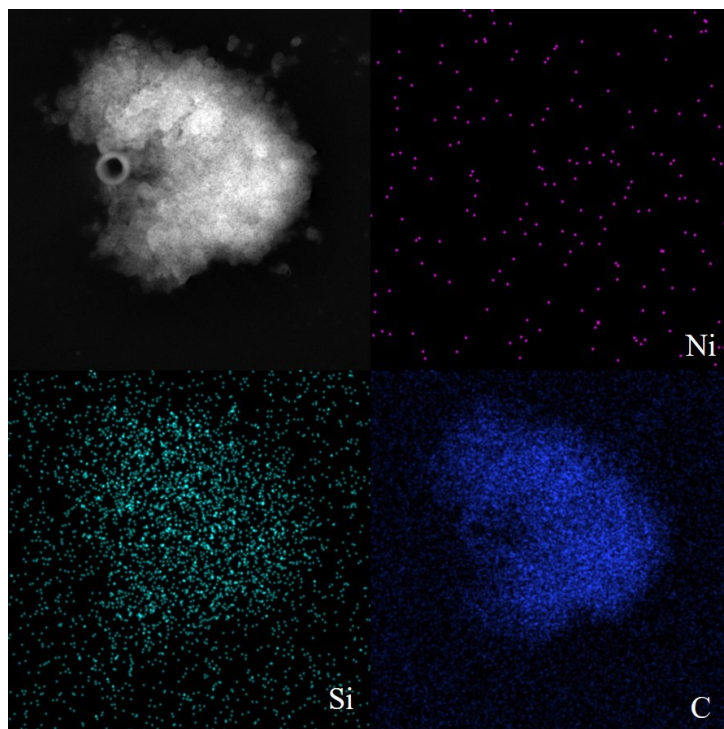

Figure S15. EDX-mapping of Ni, Si and C element in  $\text{Ni}_2\text{Si}/\text{SiO}_2$  catalyst.

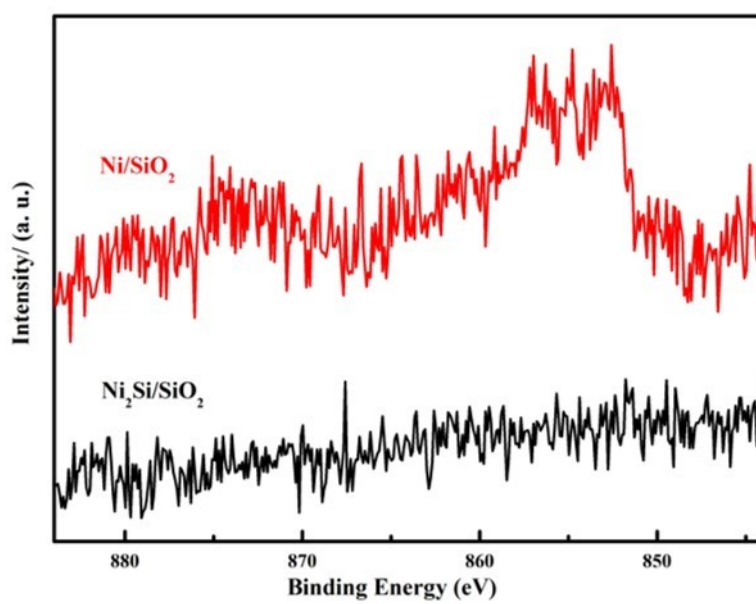

Figure S16. Ni 2p XPS spectra of  $\text{Ni}_2\text{Si}/\text{SiO}_2$  and  $\text{Ni}/\text{SiO}_2$  catalysts.

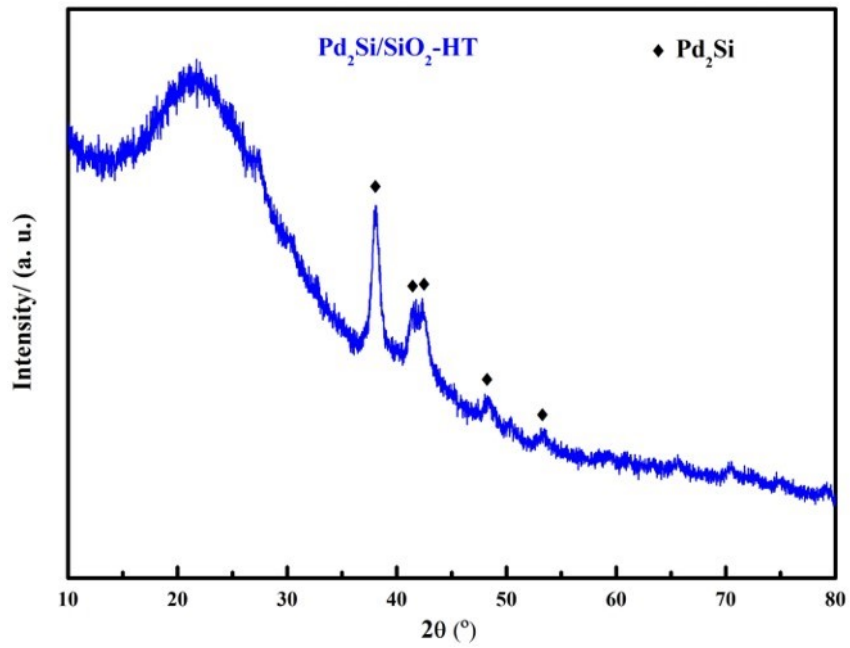

Figure S17. The XRD pattern of Pd<sub>2</sub>Si/SiO<sub>2</sub>-HT catalyst.

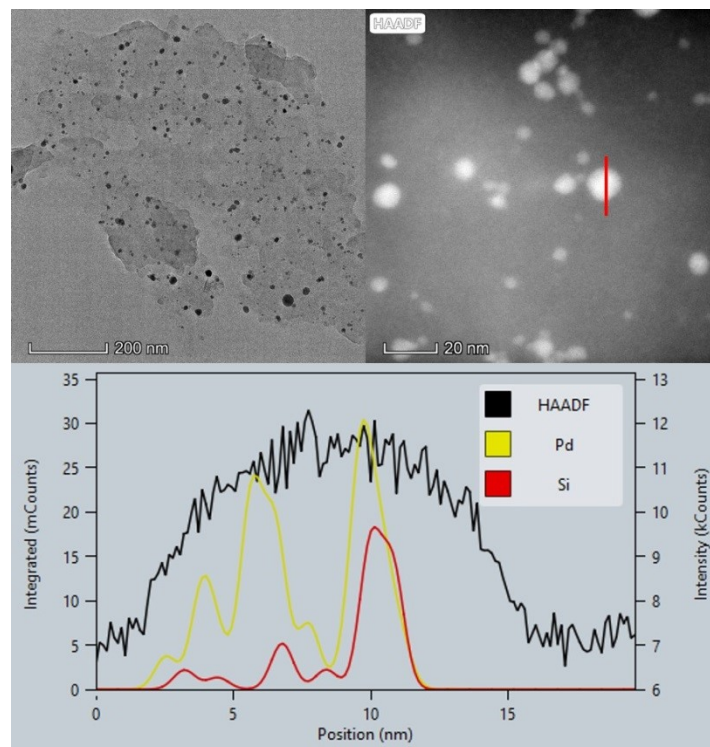

Figure S18. The TEM images and element distribution of Pd<sub>2</sub>Si/SiO<sub>2</sub>-HT catalyst.

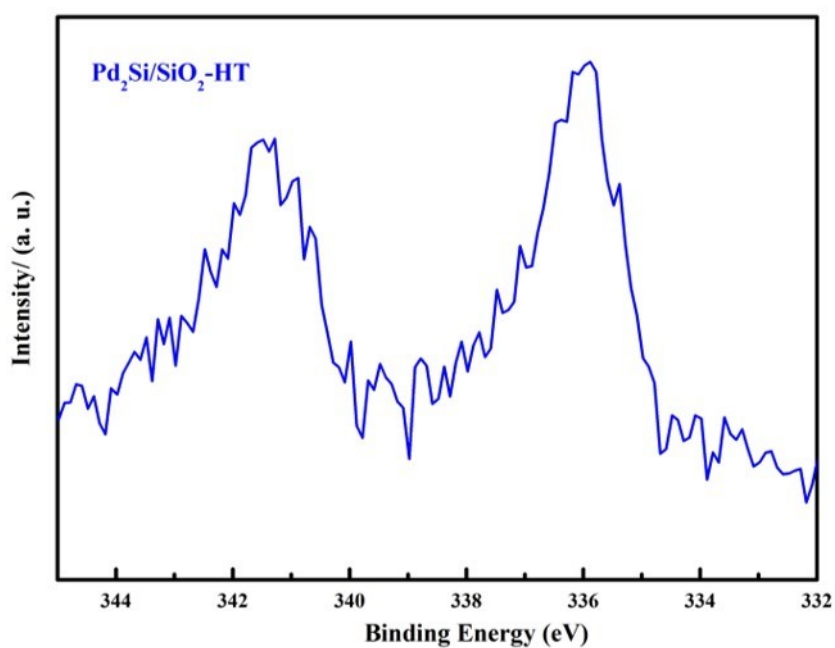

Figure S19. Pd 3d XPS spectrum of  $\text{Pd}_2\text{Si}/\text{SiO}_2$  catalyst.

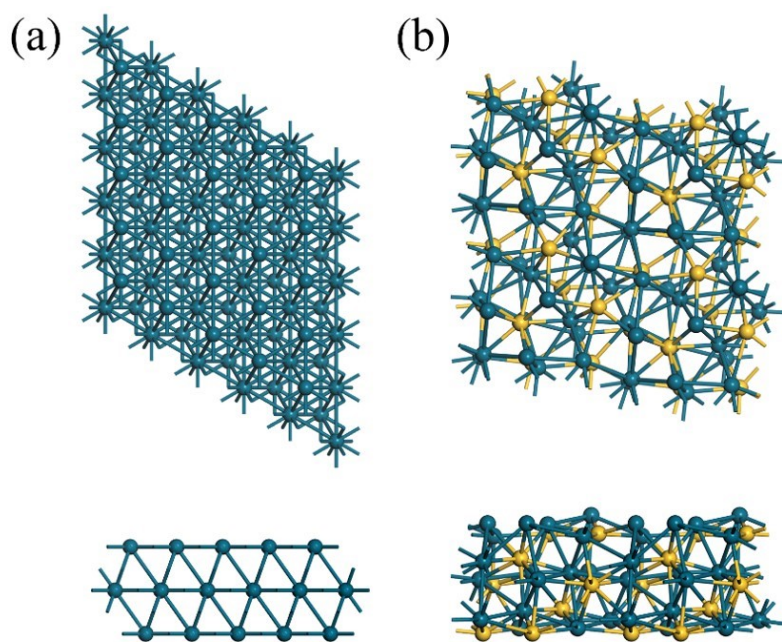

Figure S20. Top (upper) and side (lower) view of optimized atomic structures for (a) Pd(111) and (b)  $\text{Pd}_2\text{Si}(111)$  surface. The black green and yellow balls represent Pd and Si atoms, respectively.

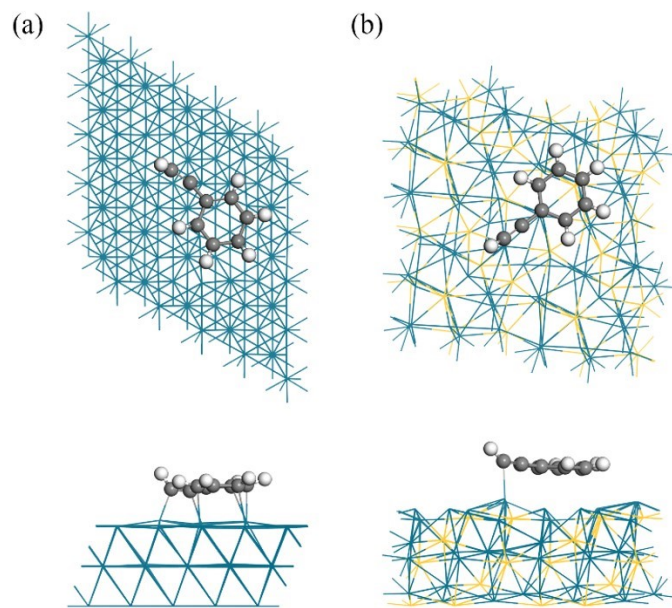

Figure S21. Optimized atomic configurations of phenylacetylene adsorbed on (a) Pd(111) and (b) Pd<sub>2</sub>Si(111) surface. The grey and white balls represent carbon and hydrogen atoms, respectively.

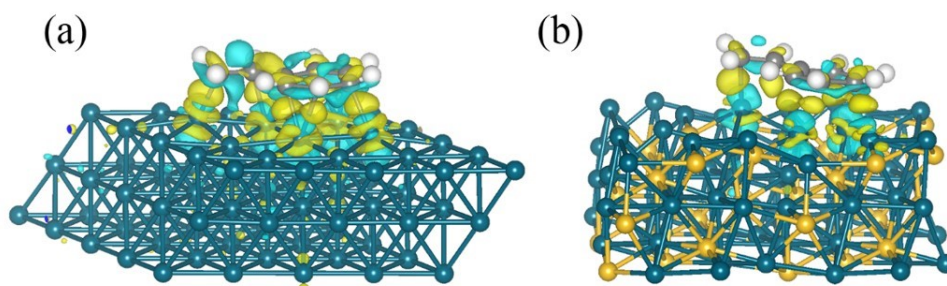

Figure S22. Deformation electronic density of styrene adsorbed on (a) Pd(111) and (b) Pd<sub>2</sub>Si(111) surface with an isosurface of  $0.003 \text{ e } \text{\AA}^{-3}$ . The yellow and cyan regions represent the accumulation and depletion of electron, respectively.
